# Supplementary material for: Glucose-6-phosphatase catalytic subunit 2 negatively regulates glucose oxidation and insulin secretion in pancreatic β-cells
Source: PubMed Central journal article supplement (PMC8941207; doi:10.1016/j.jbc.2022.101729), 2022-02-15
Supplement: mmc1.pdf [file mmc1.pdf]

**Supporting information accompanying research article titled**

**Glucose-6-phosphatase catalytic subunit 2 negatively regulates glucose oxidation and insulin secretion in pancreatic  $\beta$ -cells**

Mohsin Rahim<sup>1</sup>, Arya Y. Nakhe<sup>2</sup>, Deveena R. Banerjee<sup>2</sup>, Emily M. Overway<sup>2</sup>, Karin J. Bosma<sup>2</sup>, Jonah C. Rosch<sup>1</sup>, James K. Oeser<sup>2</sup>, Bo Wang<sup>1</sup>, Ethan S. Lippmann<sup>1,3,4</sup>, David A. Jacobson<sup>2</sup>, Richard M. O'Brien<sup>2</sup>, Jamey D. Young<sup>1,2</sup> §

<sup>1</sup>Department of Chemical and Biomolecular Engineering, <sup>2</sup>Department of Molecular Physiology and Biophysics, <sup>3</sup>Department of Biomedical Engineering, <sup>4</sup>Department of Neurology, Vanderbilt University, Nashville, TN USA

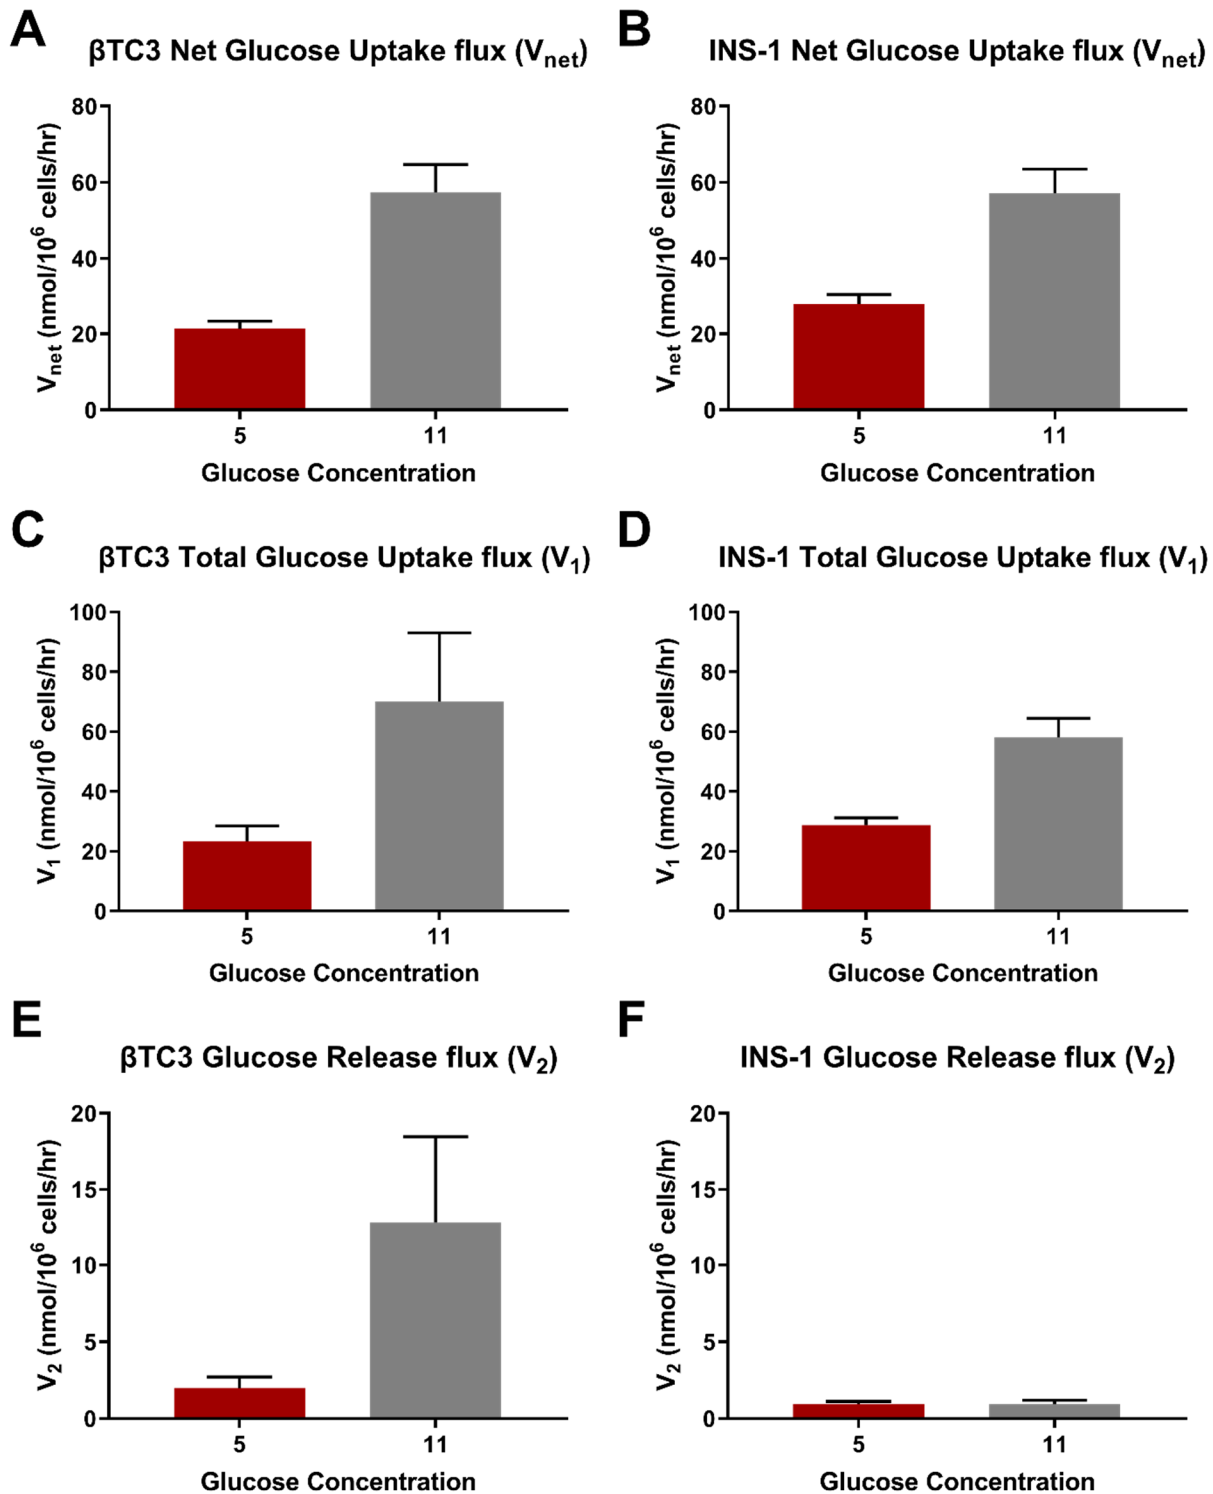

**Figure S1: Measurement of glucose uptake and release fluxes in  $\beta$ TC3 and INS-1 832/13 rat insulinoma cells**

Measurement of (A-B) net glucose uptake flux ( $v_{net}$ ), (C-D) total glucose uptake flux ( $v_1$ ), and (E-F) total glucose release flux ( $v_2$ ) at 5 and 11 mM glucose concentrations in  $\beta$ TC3 and INS-1 832/13 cells. Data represent means $\pm$ SEM (n=3).

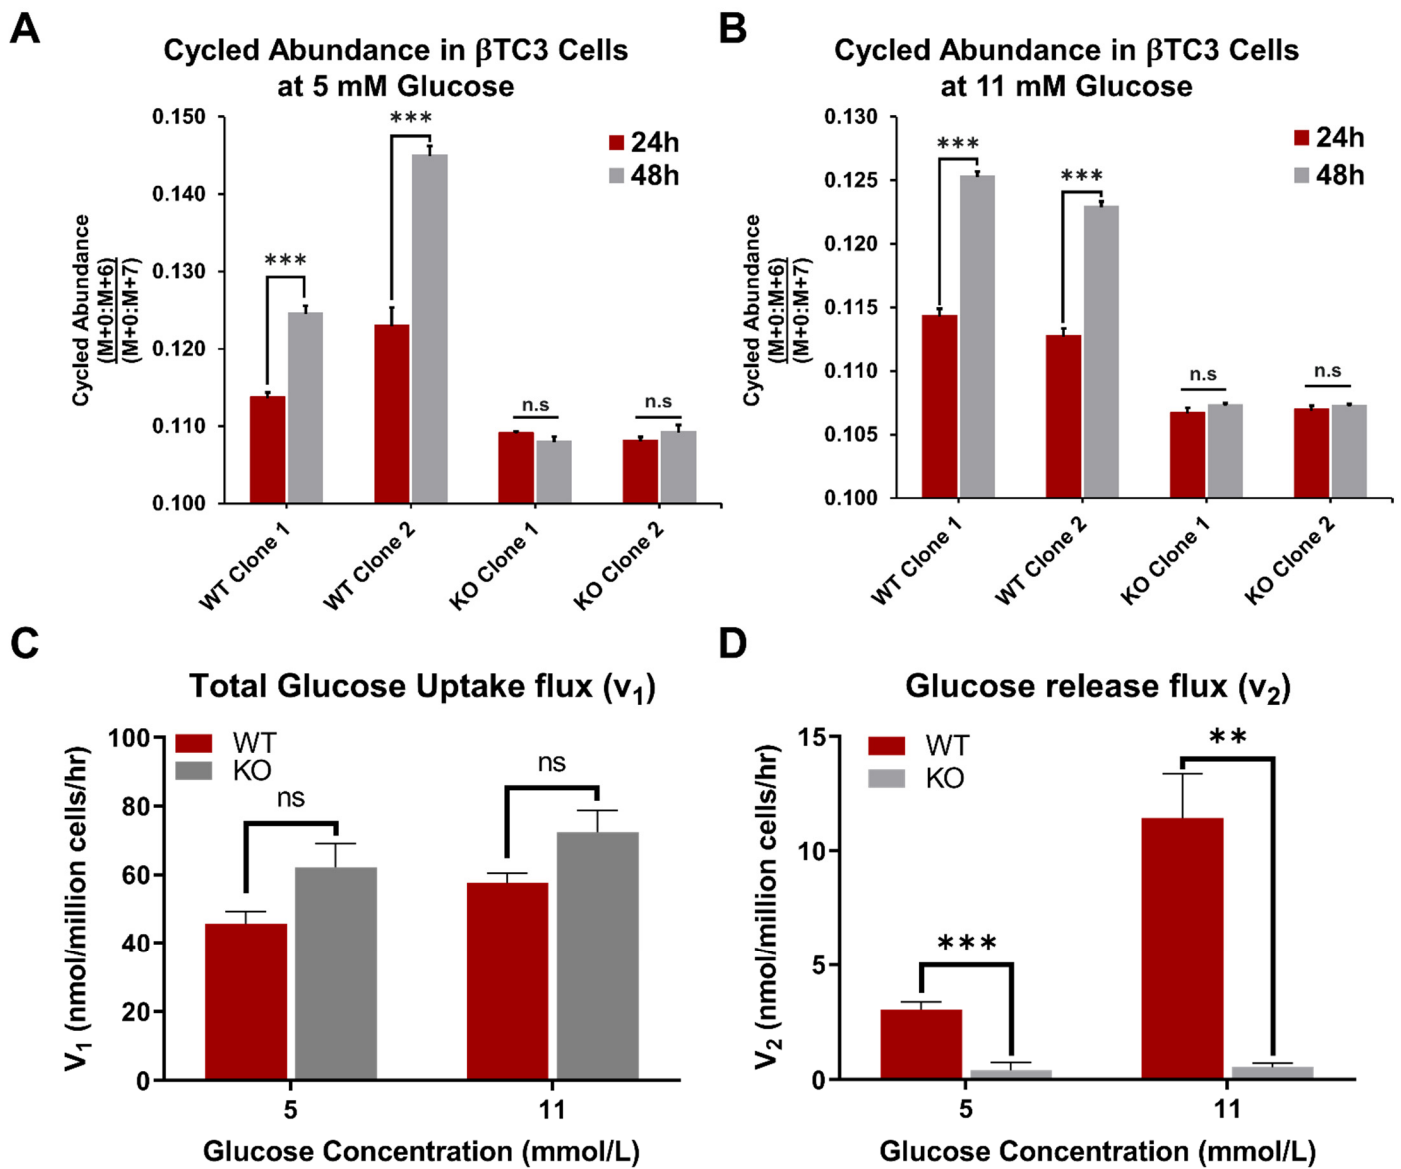

**Figure S2: Cycled abundance in two biological isolates of *G6pc2* WT and KO  $\beta$ TC3 single cell clones at 5 and 11 mM glucose concentrations**

Cycled abundance, which is the ratio M+0:M+6 isotopomers to M+0:M+7 isotopomers, measured in cell media taken at 24h and 48h after incubation with [1,2,3,4,5,6,6- $^2$ H $_7$ ]glucose at (A) 5 mM and (B) 11 mM glucose concentrations. Data represent means $\pm$ SEM, \*\*\* $p$ <0.01 (n=3). (C) Total glucose uptake flux ( $v_1$ ) and (D) Total glucose release flux ( $v_2$ ) measured in  $\beta$ TC3 *G6pc2* WT and KO cells. Data represent means $\pm$ SEM (n=3).

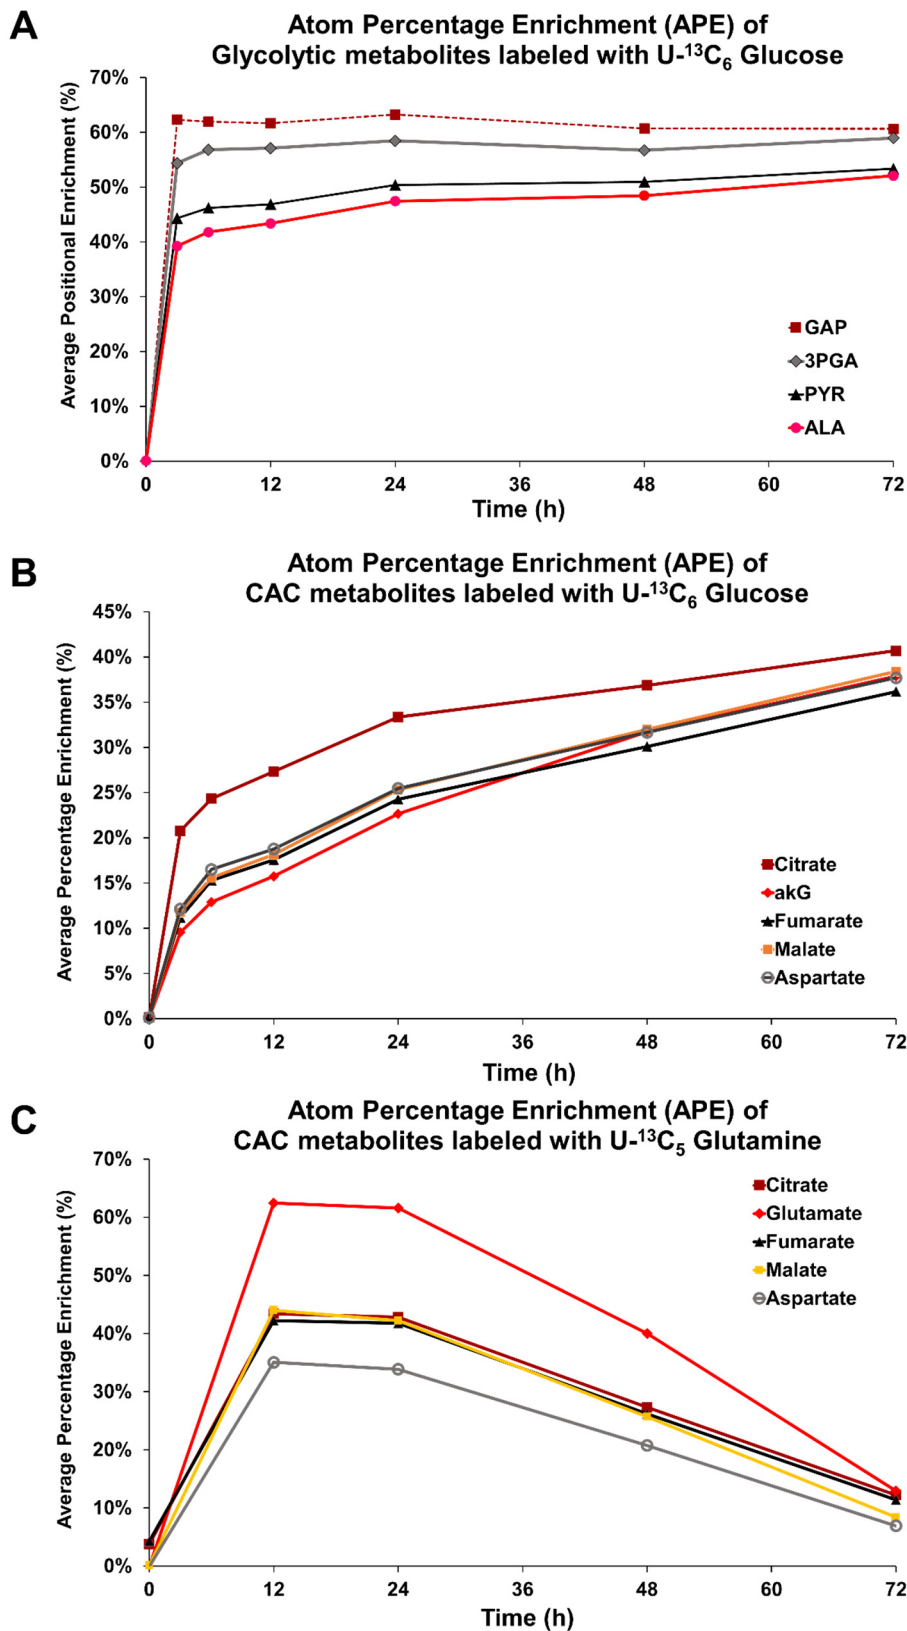

**Figure S3: Atom percentage enrichment (APE) in metabolites over time to determine isotopic steady state in isotope labelling experiments**

A) APE in glycolytic metabolites reaches steady state within 24h when labelled with 11 mM [U-<sup>13</sup>C<sub>6</sub>]glucose.  
 B) APE in CAC metabolites continues to increase in enrichment over 72h when labelled with 11 mM [U-<sup>13</sup>C<sub>6</sub>]glucose.  
 C) APE in CAC metabolites reaches steady state between 12 to 24h when labelled with 2 mM [U-<sup>13</sup>C<sub>5</sub>]glutamine.

## A Absolute Extracellular Fluxes - 5 mM Glucose

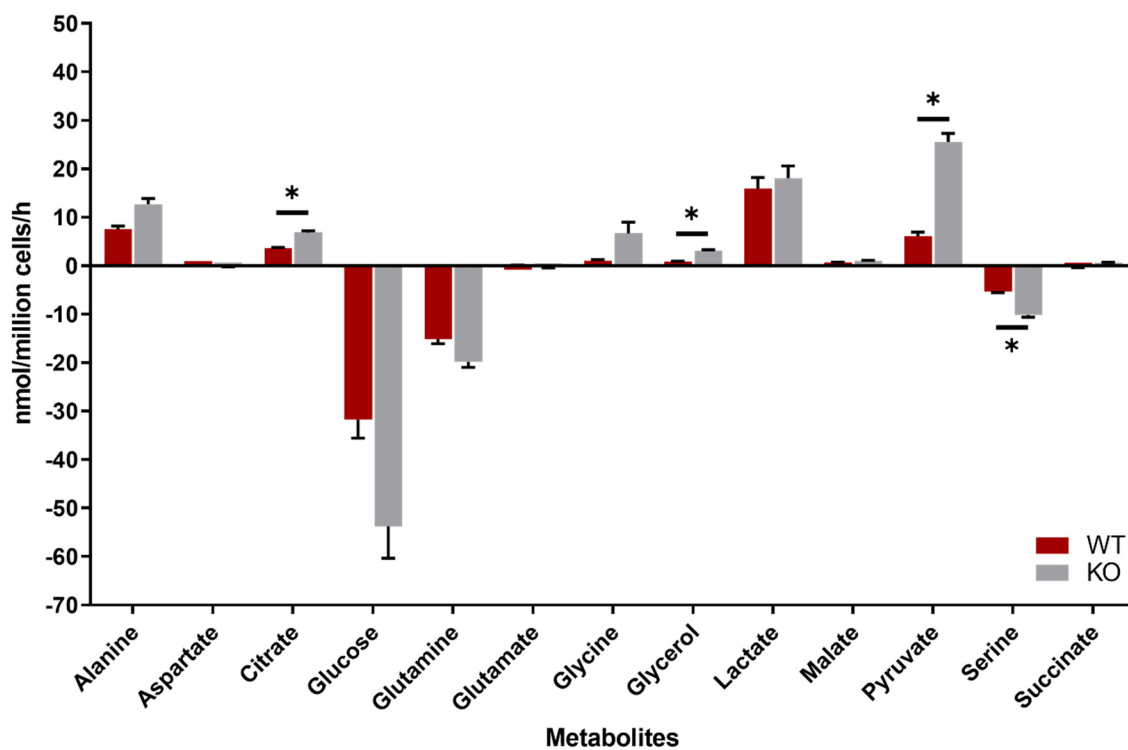

## B Absolute Extracellular Fluxes - 11 mM Glucose

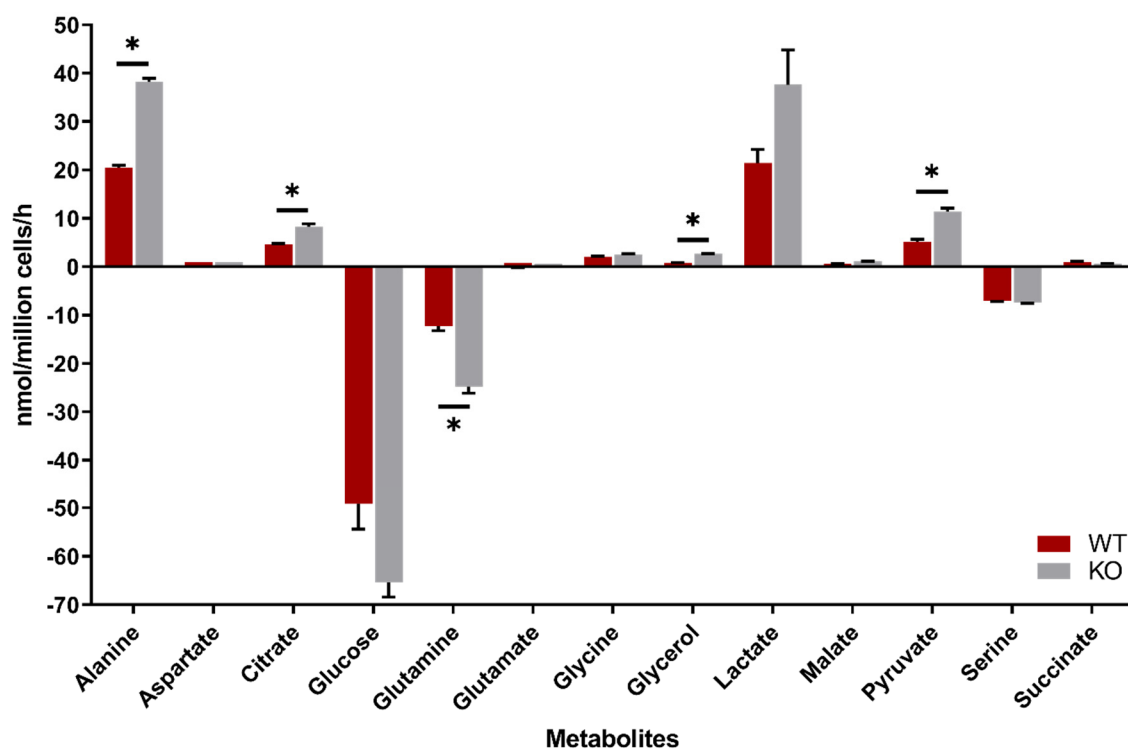

**Figure S4: Extracellular uptake and excretion rates in *G6pc2* WT and KO  $\beta$ TC3 cells**

Extracellular uptake and excretion measured in *G6pc2* WT and KO  $\beta$ TC3 cells incubated at (A) 5 and (B) 11 mM glucose concentrations. Positive values represent excretion fluxes while negative values indicate net uptake of metabolite. Data represent means  $\pm$  SEM, \* $p$  < 0.05 (n=3).

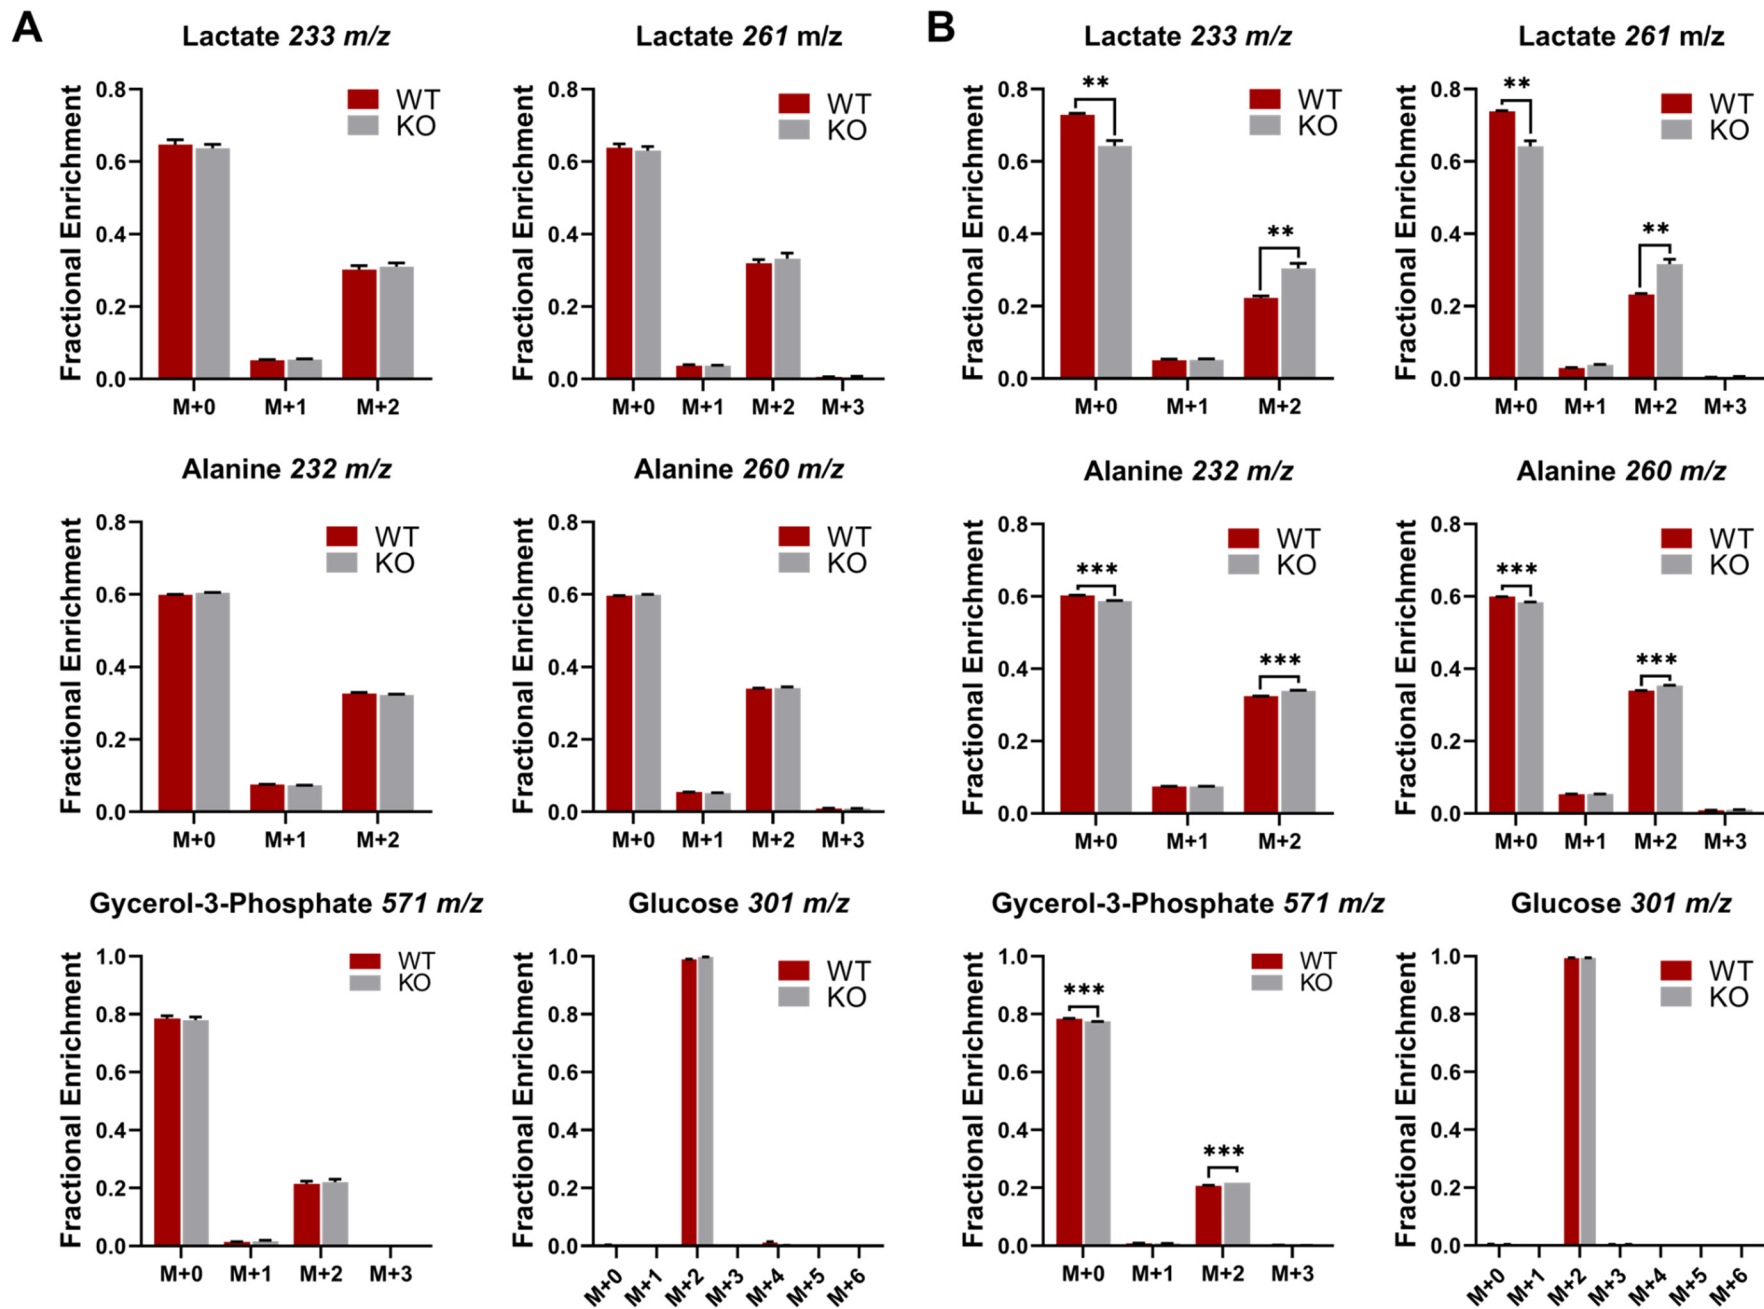

**Figure S5: Enrichment of glycolytic metabolites in *G6pc2* WT and KO  $\beta$ TC3 cells labeled with  $[1,2-^{13}\text{C}_2]$ glucose**

Intracellular enrichment in glycolytic metabolites measured in *G6pc2* WT and KO  $\beta$ TC3 cells incubated with (A) 5 and (B) 11 mM  $[1,2-^{13}\text{C}_2]$ glucose. Data represent means $\pm$ SEM, \*\*\* $p$ <0.01, \*\* $p$ <0.05 ( $n$ =3).

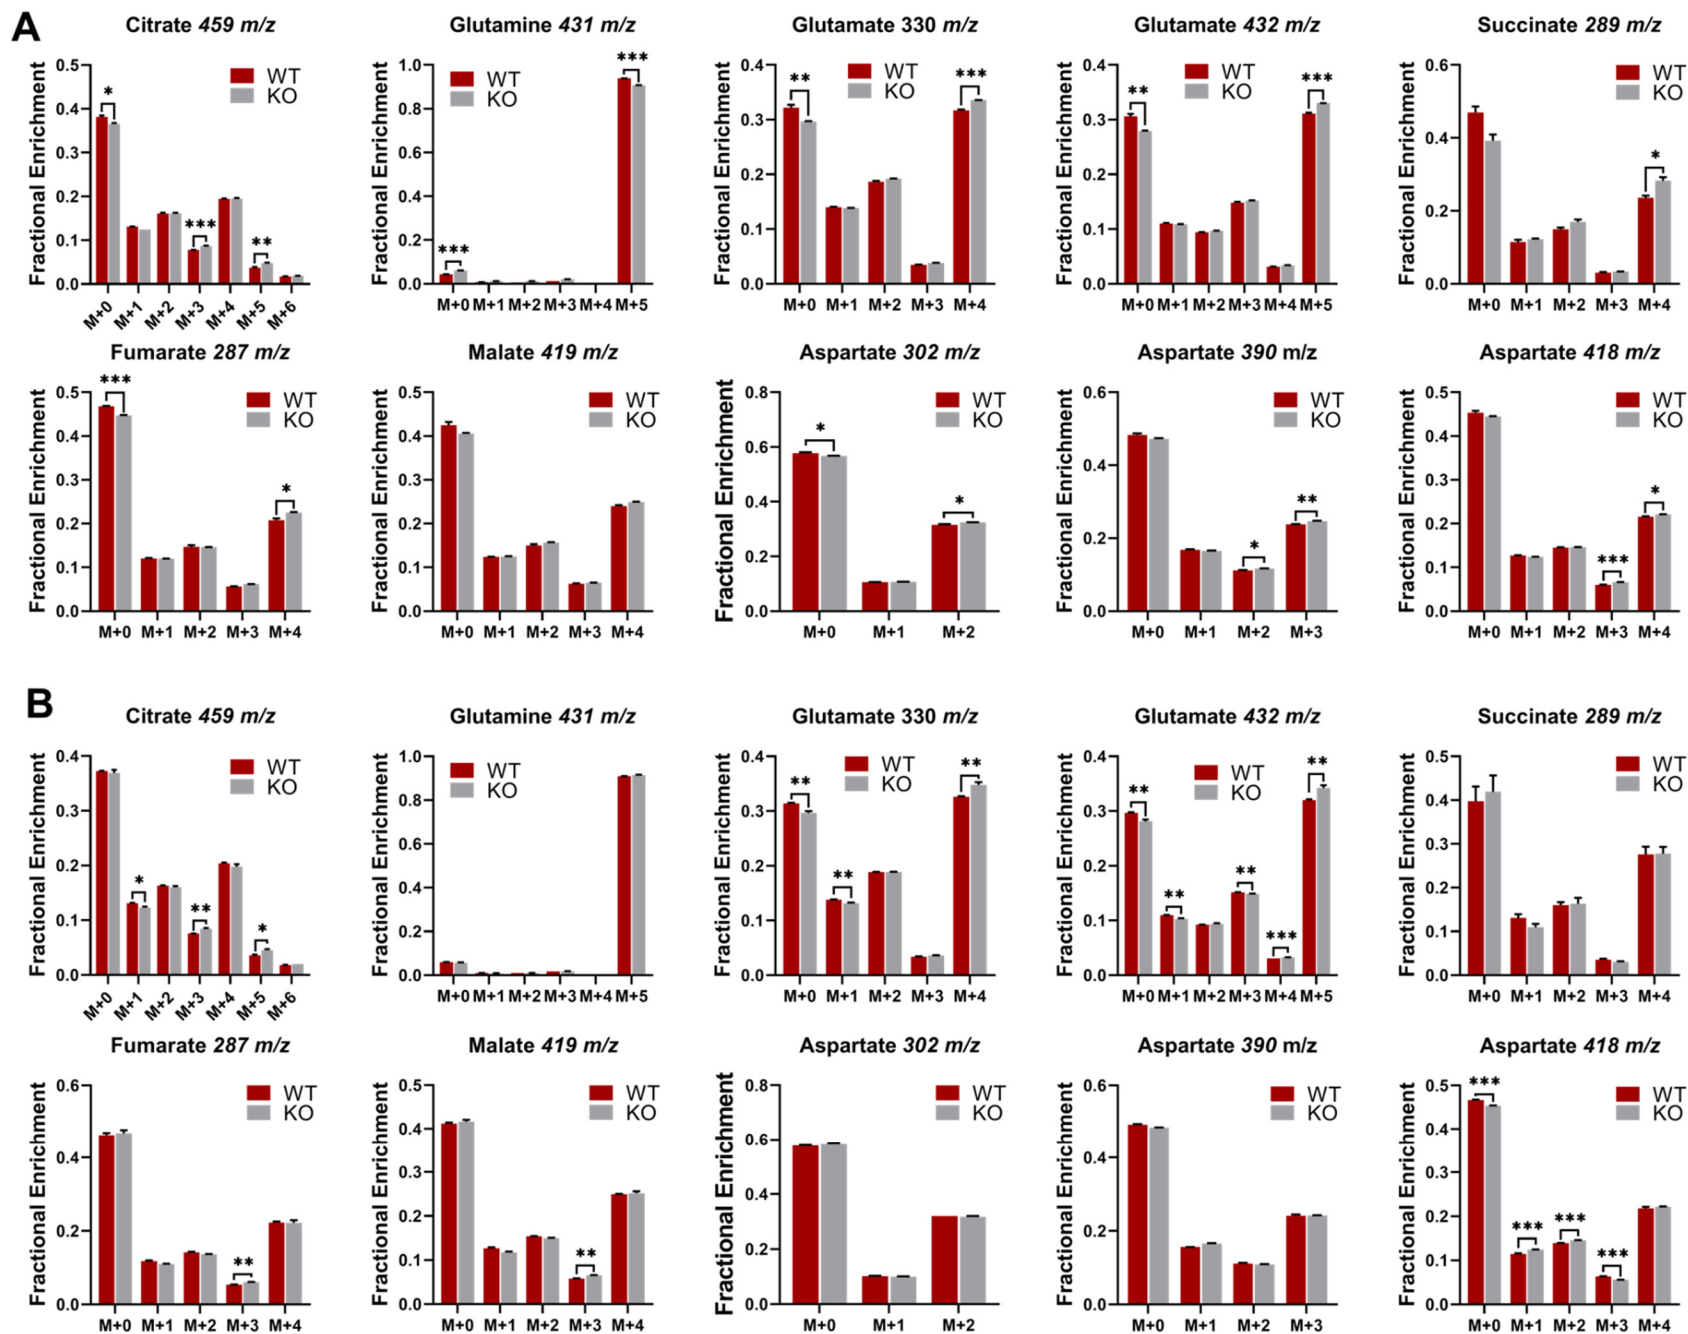

**Figure S6: Enrichment of CAC metabolites in *G6pc2* WT and KO  $\beta$ TC3 cells labeled with 2 mM  $[U-^{13}C_5]$ glutamine**  
 Intracellular enrichment in CAC metabolites measured in *G6pc2* WT and KO  $\beta$ TC3 cells incubated with (A) 5 and (B) 11 mM glucose. Data represent means $\pm$ SEM, \*\*\* $p$ <0.01, \*\* $p$ <0.05, \* $p$ <0.01 ( $n$ =3).

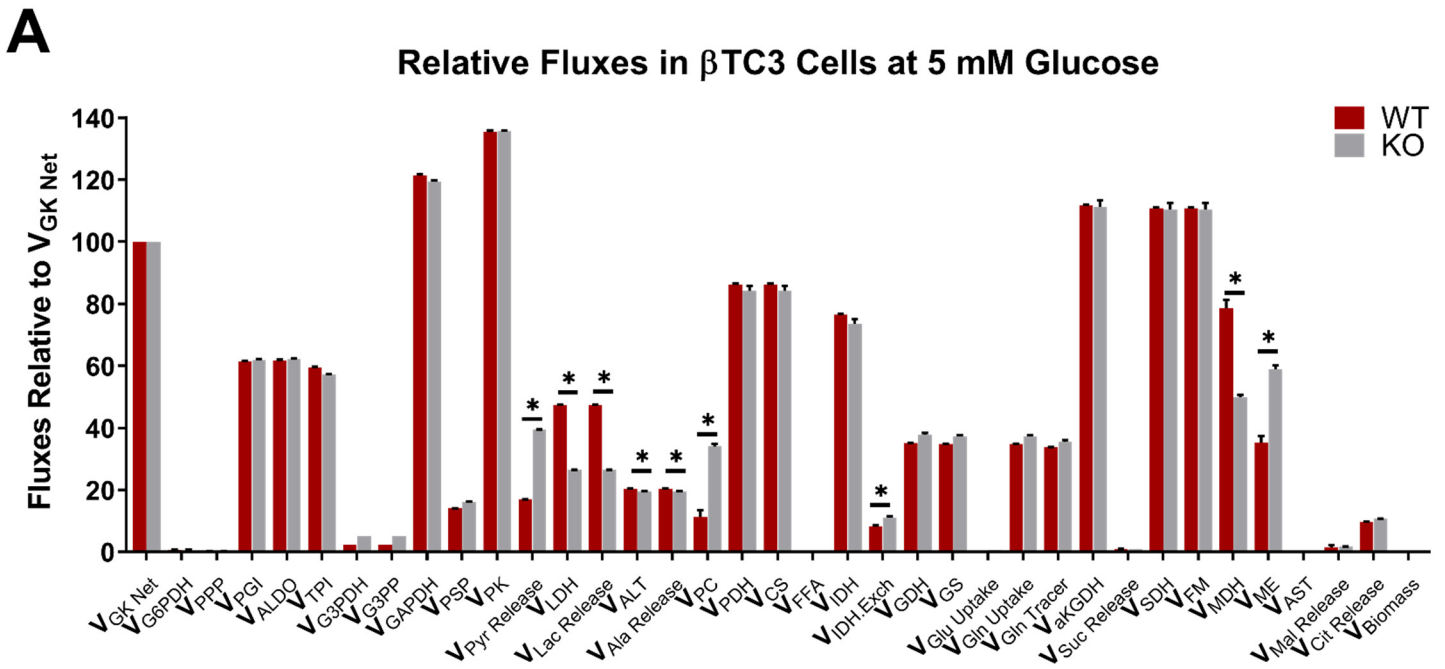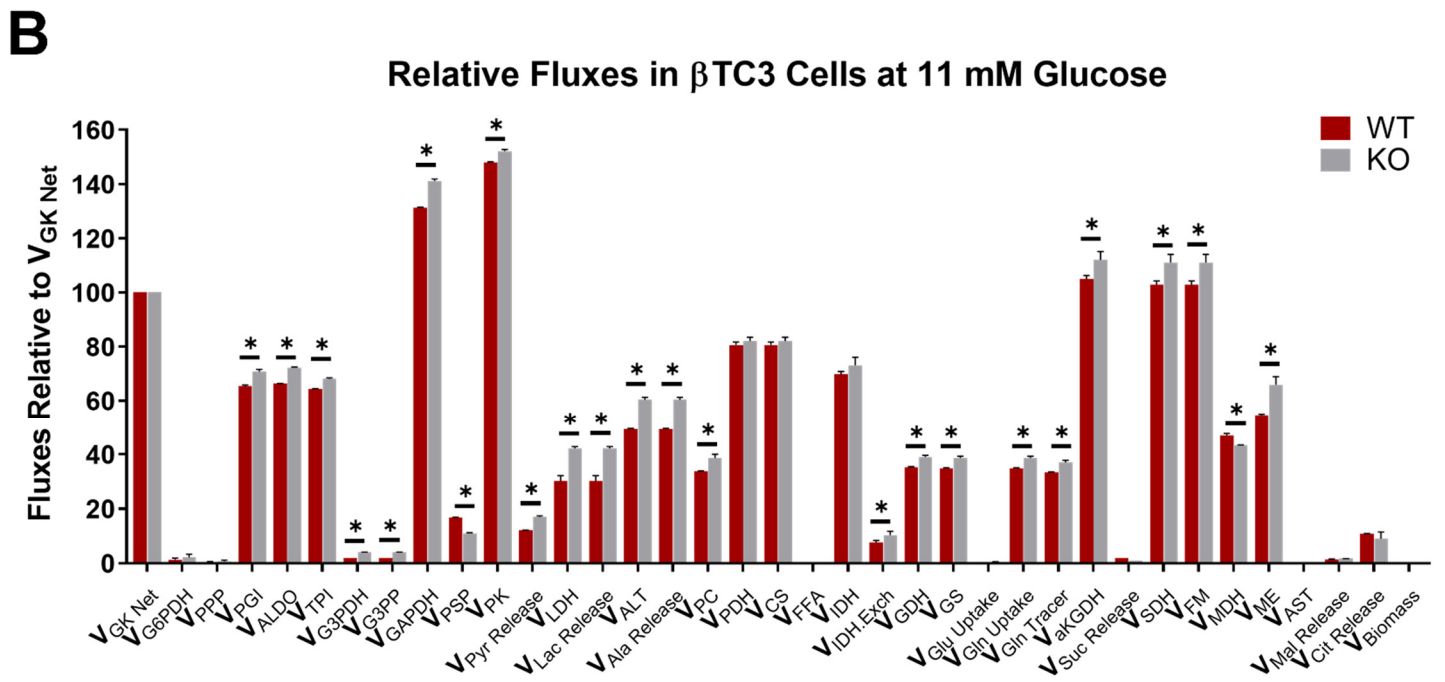

**Figure S7: Metabolic fluxes relative to net glucose uptake in *G6pc2* WT and KO  $\beta$ TC3 cells**  
 Metabolic fluxes relative to net glucose uptake ( $V_{GK\ Net}$ ) in *G6pc2* WT and KO  $\beta$ TC3 cells at (A) 5 mM and (B) 11 mM (right) glucose concentrations estimated using MFA. Data represent means $\pm$ SEM, \* $p < 0.05$  (n=3)



**A****Intracellular metabolite concentration at 5 mM glucose**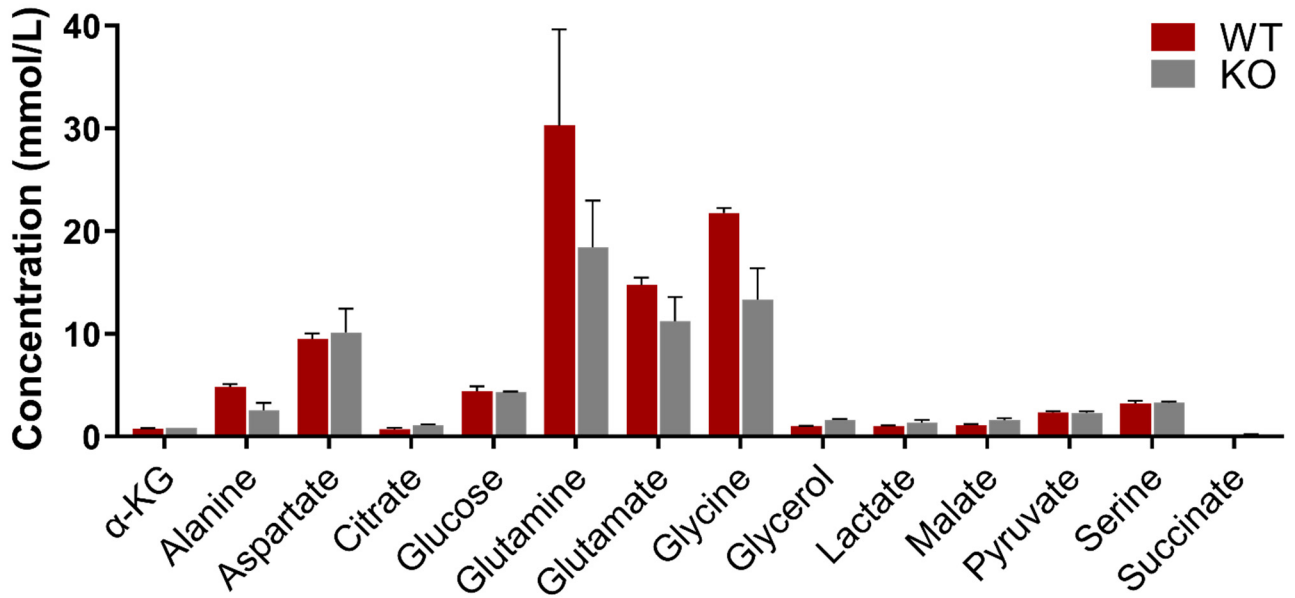**B****Intracellular metabolite concentration at 11 mM glucose**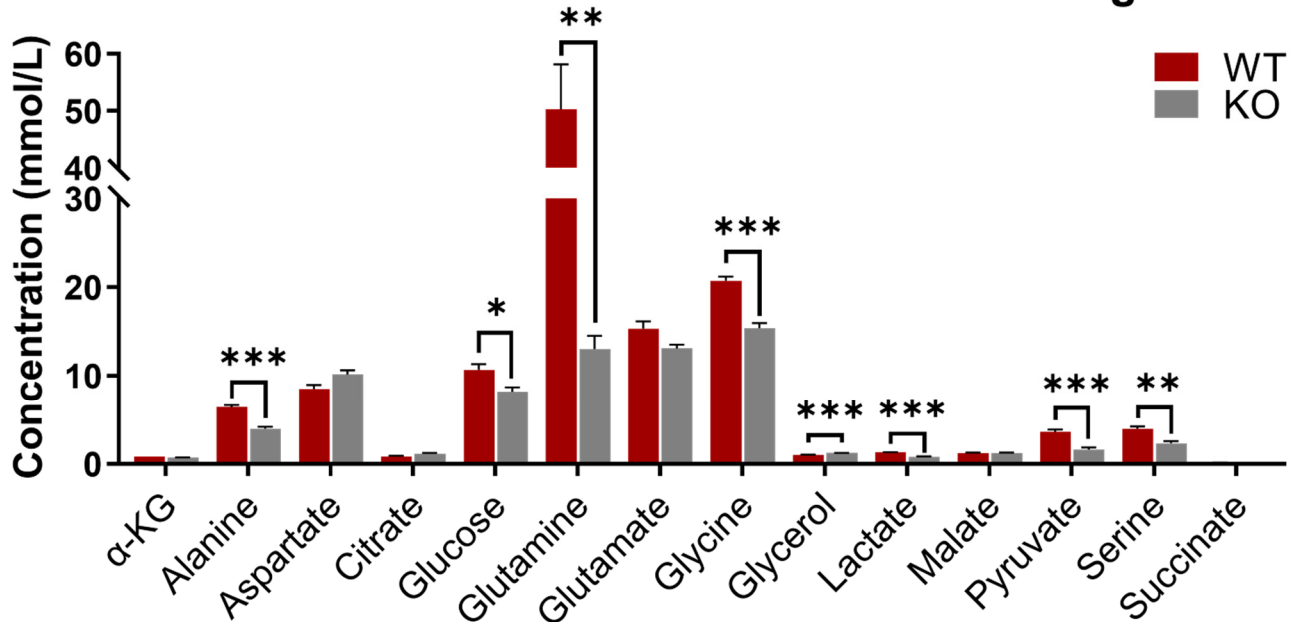

**Figure S8: Intracellular metabolite abundance in *G6pc2* WT and KO  $\beta$ TC3 cells labeled with 2 mM [U- $^{13}\text{C}_5$ ]glutamine**

Intracellular metabolite abundance measured in *G6pc2* WT and KO  $\beta$ TC3 cells incubated with (A) 5 and (B) 11 mM glucose. Data represent means $\pm$ SEM, \*\*\* $p$ <0.01, \*\* $p$ <0.05, \* $p$ <0.10 ( $n$ =3).

## mRNA expression of genes associated with redox balance

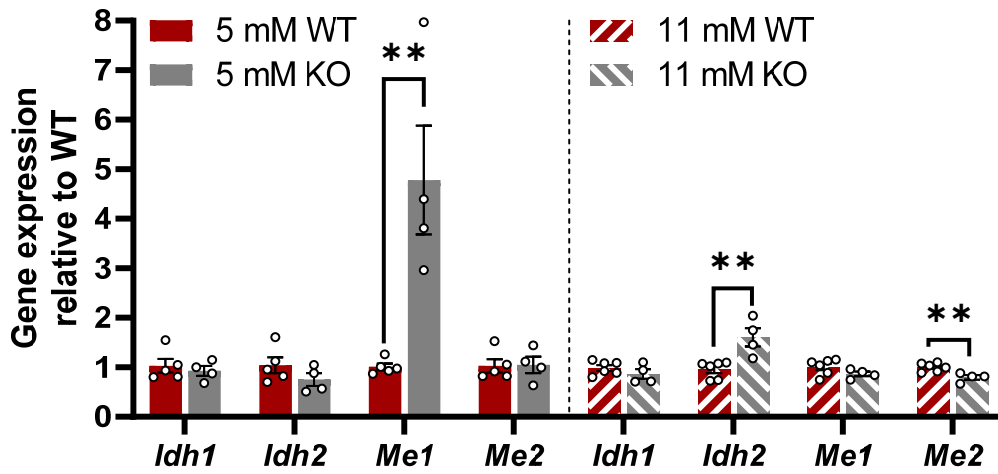

**Figure S9: Effects of the loss of *G6pc2* on expression of genes regulating redox control.** mRNA expression of genes regulating redox metabolism. Data represent means $\pm$ SEM (n=3) relative to expression of the WT, \*\*p<0.05 (n=3).

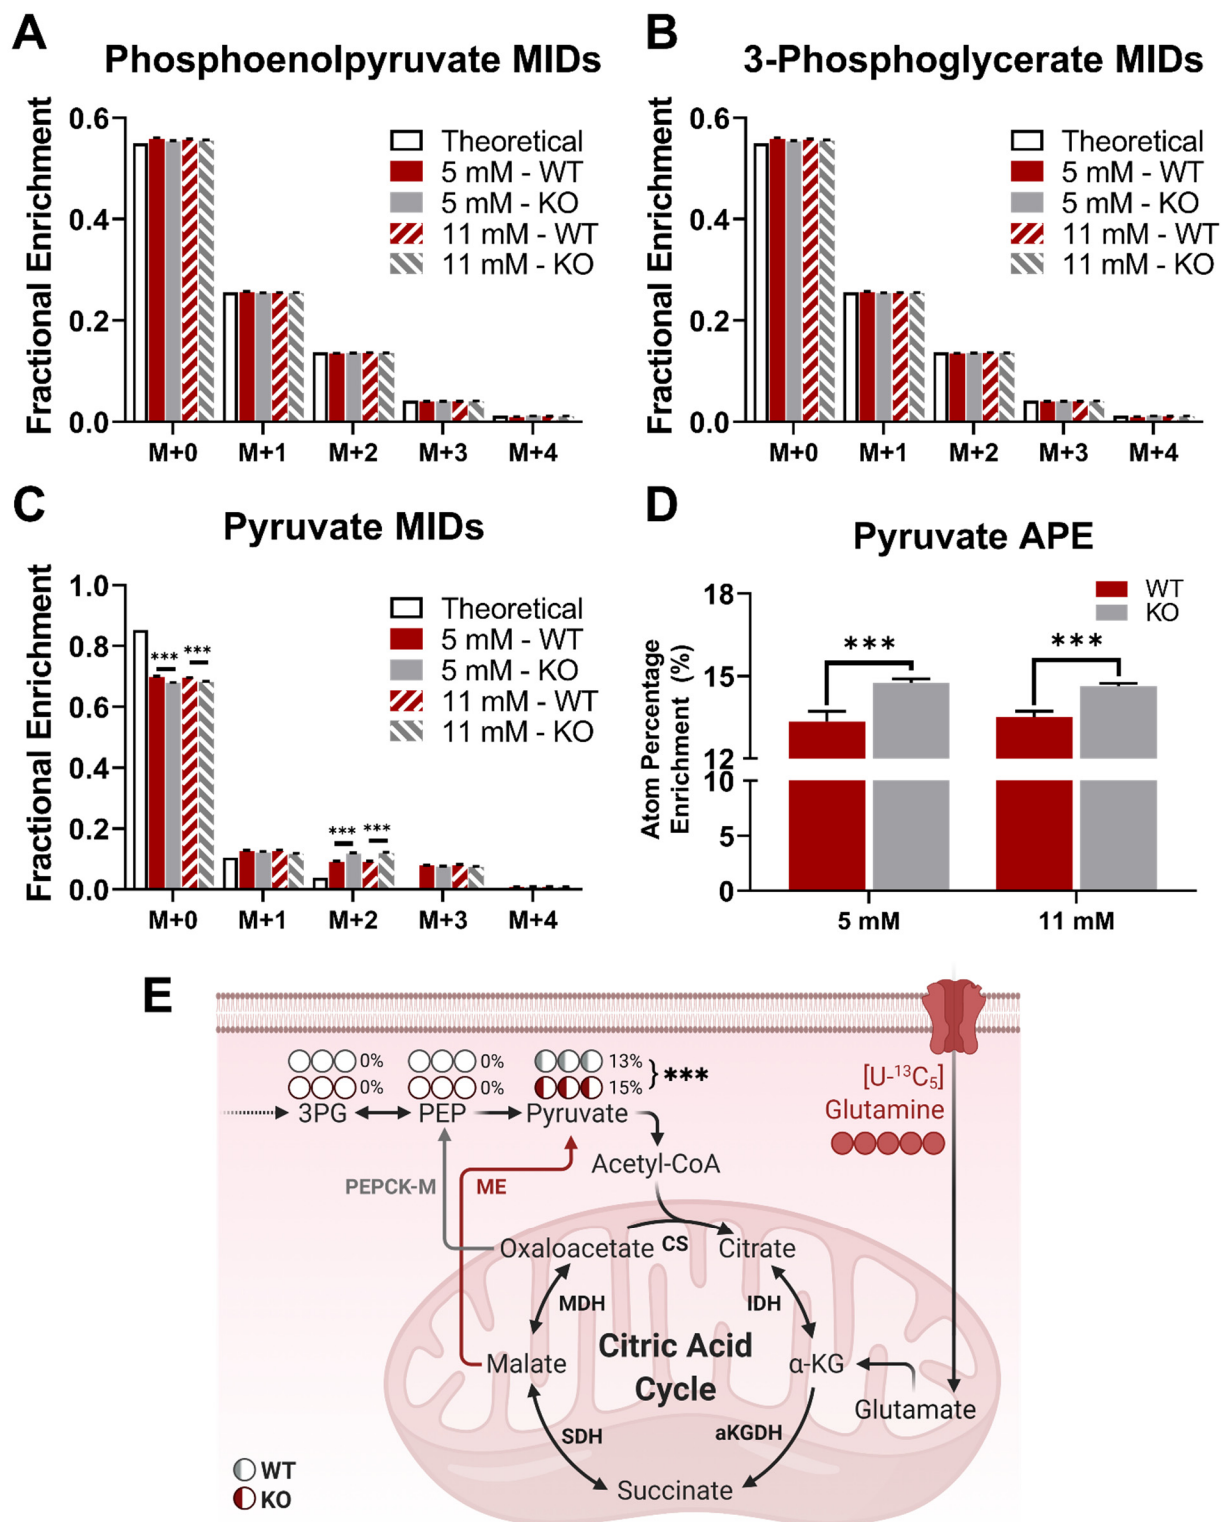

**Figure S10: Enrichment patterns in glycolytic metabolites after incubation with 2 mM [U-<sup>13</sup>C<sub>5</sub>]glutamine** Intracellular enrichment in (A) phosphoenolpyruvate (PEP) (B) 3-phosphoglycerate (3PG), and (C) pyruvate, uncorrected for background abundance in *G6pc2* WT and KO βTC3 cells at 5 and 11 mM glucose concentrations incubated with 2 mM [U-<sup>13</sup>C<sub>5</sub>]glutamine for 24h. The theoretical values represent the unlabeled MIDs for each metabolite. (D) APE of pyruvate at 5 and 11 mM glucose concentrations (E) Schematic showing pathways that can enrich 3PG, PEP and pyruvate when [U-<sup>13</sup>C<sub>5</sub>]glutamine is used as tracer. Only pyruvate showed isotopic enrichment while PEP and 3PG had negligible <sup>13</sup>C incorporation, suggesting that PEPCK-M is inactive at steady state in βTC3 cells. Data represent means±SEM, \*\*\**p*<0.01 (n=3).

**Table S1. Pancreatic  $\beta$ -cell metabolic reaction network for  $^{13}\text{C}$  MFA. (Related to Fig. 4-6 and Table S2)**  
 Network maps of  $\beta$ -cell metabolism track carbon atoms through model reactions. Metabolites used to regress fluxes in both compartments are shown in Table S2. Unenriched sources and sinks and “ $\text{CO}_2$ ” are annotated as “.source” and “.sink”, respectively.  $^{13}\text{C}$  isotopes are introduced into model reactions as “.tracer”. Extracellular metabolites are designated as “.ext”.

| <b>Glycolysis</b>                |                                                                         |
|----------------------------------|-------------------------------------------------------------------------|
| $V_{\text{Gluc.source}}$         | Gluc.source (ABCDEF) $\rightarrow$ Gluc (ABCDEF)                        |
| $V_{\text{GK}}$                  | Gluc (ABCDEF) $\rightarrow$ G6P (ABCDEF)                                |
| $V_{\text{PGI}}$                 | G6P (ABCDEF) $\rightarrow$ F6P (ABCDEF)                                 |
| $V_{\text{ALDO}}$                | F6P (ABCDEF) $\rightarrow$ DHAP (CBA) + GAP (DEF)                       |
| $V_{\text{TPI}}$                 | DHAP (ABC) $\leftrightarrow$ GAP (ABC)                                  |
| $V_{\text{G3PDH}}$               | DHAP (ABC) $\rightarrow$ G3P (ABC)                                      |
| $V_{\text{G3PP}}$                | G3P (ABC) $\rightarrow$ Glycerol.ext (ABC)                              |
| $V_{\text{GAPDH}}$               | GAP (ABC) $\rightarrow$ 3PG (ABC)                                       |
| $V_{\text{PSP}}$                 | Ser (ABC) $\rightarrow$ 3PG (ABC)                                       |
| $V_{\text{PK}}$                  | 3PG (ABC) $\rightarrow$ Pyr (ABC)                                       |
| $V_{\text{Pyr.exch}}$            | Pyr (ABC) $\leftrightarrow$ Pyr.ext (ABC)                               |
| $V_{\text{Pyr.release}}$         | Pyr.ext (ABC) $\rightarrow$ Pyr.sink (ABC)                              |
| $V_{\text{LDH}}$                 | Pyr (ABC) $\leftrightarrow$ Lac (ABC)                                   |
| $V_{\text{Lac.exch}}$            | Lac (ABC) $\leftrightarrow$ Lac.ext (ABC)                               |
| $V_{\text{Lac.release}}$         | Lac.ext (ABC) $\rightarrow$ Lac.sink (ABC)                              |
| $V_{\text{ALT}}$                 | Pyr (ABC) $\leftrightarrow$ Ala (ABC)                                   |
| $V_{\text{Ala.exch}}$            | Ala (ABC) $\leftrightarrow$ Ala.ext (ABC)                               |
| $V_{\text{Ala.release}}$         | Ala.ext (ABC) $\rightarrow$ Ala.sink (ABC)                              |
| $V_{\text{PC}}$                  | Pyr (ABC) + $\text{CO}_2$ (D) $\rightarrow$ Oac (ABCD)                  |
| $V_{\text{PDH}}$                 | Pyr (ABC) $\rightarrow$ AcCoA (BC) + $\text{CO}_2$ (A)                  |
| <b>Pentose Phosphate Pathway</b> |                                                                         |
| $V_{\text{G6PDH}}$               | G6P (ABCDEF) $\rightarrow$ P5P (BCDEF) + $\text{CO}_2$ (A)              |
| $V_{\text{TK1}}$                 | S7P (ABCDEFGF) + GAP (HIJ) $\leftrightarrow$ F6P (ABCHIJ) + E4P (DEFG)  |
| $V_{\text{PPP}}$                 | P5P (ABCDE) + P5P (FGHIJ) $\leftrightarrow$ S7P (ABFGHIJ) + GAP (CDE)   |
| $V_{\text{TK2}}$                 | P5P (ABCDE) + E4P (FGHI) $\leftrightarrow$ F6P (ABFGHI) + GAP (CDE)     |
| <b>Citric Acid Cycle</b>         |                                                                         |
| $V_{\text{CS}}$                  | Oac (ABCD) + AcCoA (EF) $\rightarrow$ Cit (DCBFEA)                      |
| $V_{\text{Fat.entry}}$           | FA (AB) $\rightarrow$ AcCoA (AB)                                        |
| $V_{\text{IDH}}$                 | Cit (ABCDEF) $\leftrightarrow$ $\alpha$ -kg (ABCDE) + $\text{CO}_2$ (F) |
| $V_{\text{GDH}}$                 | Glu (ABCDE) $\leftrightarrow$ $\alpha$ -kg (ABCDE)                      |

|                                                                      |                                                                     |
|----------------------------------------------------------------------|---------------------------------------------------------------------|
| $V_{GS}$                                                             | Gln (ABCDE) $\leftrightarrow$ Glu (ABCDE)                           |
| $V_{Glu.entry}$                                                      | Glu.ext (ABCDE) $\leftrightarrow$ Glu (ABCDE)                       |
| $V_{Glu.source}$                                                     | Glu.source (ABCDE) $\rightarrow$ Glu.ext (ABCDE)                    |
| $V_{Gln.source}$                                                     | Gln.source (ABCDE) $\rightarrow$ Gln.ext (ABCDE)                    |
| $V_{Gln.entry}$                                                      | Gln.ext (ABCDE) $\rightarrow$ Gln (ABCDE)                           |
| $V_{\alpha KGDH}$                                                    | $\alpha$ -kg (ABCDE) $\rightarrow$ Suc (BCDE) + CO <sub>2</sub> (A) |
| $V_{Suc.release}$                                                    | Suc (ABCD) $\rightarrow$ Suc.ext (ABCD)                             |
| $V_{SDH}$                                                            | Suc (ABCD) $\leftrightarrow$ Fum (ABCD)                             |
| $V_{FM}$                                                             | Fum (ABCD) $\leftrightarrow$ Mal (ABCD)                             |
| $V_{MDH}$                                                            | Mal (ABCD) $\leftrightarrow$ Oac (ABCD)                             |
| $V_{ME}$                                                             | Mal (ABCD) $\leftrightarrow$ Pyr (ABC) + CO <sub>2</sub> (D)        |
| $V_{AST}$                                                            | Oac (ABCD) $\leftrightarrow$ Asp (ABCD)                             |
| $V_{Asp.exch}$                                                       | Asp (ABCD) $\leftrightarrow$ Asp.ext (ABCD)                         |
| $V_{Asp.source}$                                                     | Asp.source (ABCD) $\rightarrow$ Asp.ext (ABCD)                      |
| $V_{Mal.release}$                                                    | Mal $\rightarrow$ Mal.sink                                          |
| $V_{Cit.release}$                                                    | Cit $\rightarrow$ Cit.sink                                          |
| <b>Isotope uptake, CO<sub>2</sub> recycling and biomass equation</b> |                                                                     |
| $V_{Gluc.tracer}$                                                    | Gluc.tracer (ABCDEF) $\rightarrow$ Gluc (ABCDEF)                    |
| $V_{Gln.tracer}$                                                     | Gln.tracer (ABCDE) $\rightarrow$ Gln.ext (ABCDE)                    |
| $V_{CO2.source}$                                                     | CO <sub>2</sub> .source (A) $\rightarrow$ CO <sub>2</sub> (A)       |
| $V_{CO2.sink}$                                                       | CO <sub>2</sub> (A) $\rightarrow$ CO <sub>2</sub> .sink (A)         |
| $V_{Biomass}$                                                        | 1389*G6P $\rightarrow$ Biomass                                      |

**Table S2. GC-MS fragment ions of measured metabolites regressed using the metabolic model for MFA. (Related to Fig. 4-6, S3, S5-7 and Table S1)**

| <b>Metabolite</b>    | <b><i>m/z</i></b> | <b>Derivative Formula</b>                                                     | <b>Carbons</b> |           |           |           |           |           |  |
|----------------------|-------------------|-------------------------------------------------------------------------------|----------------|-----------|-----------|-----------|-----------|-----------|--|
| 3-Phosphoglycerate   | 585               | C <sub>23</sub> H <sub>54</sub> O <sub>7</sub> Si <sub>4</sub> P              | <b>C1</b>      | <b>C2</b> | <b>C3</b> |           |           |           |  |
| Alanine              | 260               | C <sub>11</sub> H <sub>26</sub> O <sub>2</sub> NSi <sub>2</sub>               | <b>C1</b>      | <b>C2</b> | <b>C3</b> |           |           |           |  |
| Alanine              | 232               | C <sub>10</sub> H <sub>26</sub> ONSi <sub>2</sub>                             |                | <b>C2</b> | <b>C3</b> |           |           |           |  |
| Aspartate            | 302               | C <sub>14</sub> H <sub>32</sub> O <sub>2</sub> NSi <sub>2</sub>               | <b>C1</b>      | <b>C2</b> |           |           |           |           |  |
| Aspartate            | 390               | C <sub>17</sub> H <sub>40</sub> O <sub>3</sub> NSi <sub>3</sub>               |                | <b>C2</b> | <b>C3</b> | <b>C4</b> |           |           |  |
| Aspartate            | 418               | C <sub>18</sub> H <sub>40</sub> O <sub>4</sub> NSi <sub>3</sub>               | <b>C1</b>      | <b>C2</b> | <b>C3</b> | <b>C4</b> |           |           |  |
| Citrate              | 459               | C <sub>20</sub> H <sub>39</sub> O <sub>6</sub> Si <sub>3</sub>                | <b>C1</b>      | <b>C2</b> | <b>C3</b> | <b>C4</b> | <b>C5</b> | <b>C6</b> |  |
| Fumarate             | 287               | C <sub>12</sub> H <sub>23</sub> O <sub>4</sub> Si <sub>2</sub>                | <b>C1</b>      | <b>C2</b> | <b>C3</b> | <b>C4</b> |           |           |  |
| Glucose              | 301               | C <sub>14</sub> H <sub>21</sub> O <sub>7</sub>                                | <b>C1</b>      | <b>C2</b> | <b>C3</b> | <b>C4</b> | <b>C5</b> | <b>C6</b> |  |
| Glutamate            | 432               | C <sub>19</sub> H <sub>42</sub> O <sub>4</sub> NSi <sub>3</sub>               |                | <b>C2</b> | <b>C3</b> | <b>C4</b> | <b>C5</b> |           |  |
| Glutamate            | 330               | C <sub>16</sub> H <sub>36</sub> O <sub>2</sub> NSi <sub>2</sub>               | <b>C1</b>      | <b>C2</b> | <b>C3</b> | <b>C4</b> | <b>C5</b> |           |  |
| Glutamine            | 431               | C <sub>19</sub> H <sub>43</sub> O <sub>3</sub> N <sub>2</sub> Si <sub>3</sub> | <b>C1</b>      | <b>C2</b> | <b>C3</b> | <b>C4</b> | <b>C5</b> |           |  |
| Glycerol             | 377               | C <sub>17</sub> H <sub>41</sub> O <sub>3</sub> Si <sub>3</sub>                | <b>C1</b>      | <b>C2</b> | <b>C3</b> |           |           |           |  |
| Glycerol-3-Phosphate | 571               | C <sub>20</sub> H <sub>51</sub> O <sub>6</sub> Si <sub>4</sub> P              | <b>C1</b>      | <b>C2</b> | <b>C3</b> |           |           |           |  |
| Lactate              | 261               | C <sub>11</sub> H <sub>25</sub> O <sub>3</sub> Si <sub>2</sub>                | <b>C1</b>      | <b>C2</b> | <b>C3</b> |           |           |           |  |
| Lactate              | 233               | C <sub>10</sub> H <sub>25</sub> O <sub>2</sub> Si <sub>2</sub>                |                | <b>C2</b> | <b>C3</b> |           |           |           |  |
| Malate               | 419               | C <sub>18</sub> H <sub>39</sub> O <sub>5</sub> Si <sub>3</sub>                | <b>C1</b>      | <b>C2</b> | <b>C3</b> | <b>C4</b> |           |           |  |
| Phosphoenolpyruvate  | 453               | C <sub>17</sub> H <sub>38</sub> O <sub>6</sub> Si <sub>3</sub> P              | <b>C1</b>      | <b>C2</b> | <b>C3</b> |           |           |           |  |
| Pyruvate             | 174               | C <sub>6</sub> H <sub>12</sub> O <sub>3</sub> NSi                             | <b>C1</b>      | <b>C2</b> | <b>C3</b> |           |           |           |  |
| Serine               | 390               | C <sub>17</sub> H <sub>40</sub> O <sub>3</sub> NSi <sub>3</sub>               | <b>C1</b>      | <b>C2</b> | <b>C3</b> |           |           |           |  |
| Succinate            | 289               | C <sub>12</sub> H <sub>25</sub> O <sub>4</sub> Si <sub>2</sub>                | <b>C1</b>      | <b>C2</b> | <b>C3</b> | <b>C4</b> |           |           |  |
